# Supplementary material for: Lived Experiences of Elderly Patients with Frailty Attending Public Hospitals in Wolaita Zone, Southern Ethiopia
Source: Research Square preprint supplement (doi:10.21203/rs.3.rs-8104094/v1), 2025-12-18
Supplement: Supplementary file 1 [file cd4ed4a49657cb07a8b8cca1.docx]

### **Frailty measurement**

In this study, frailty was assessed using the FRAIL-NH scale. This tool is applicable outside of long-term care settings because it focuses on areas highly relevant to hospitalized and outpatient older adults, namely mobility, nutrition, and dependence in activities of daily living. The instrument contains seven items: fatigue, resistance, ambulation, incontinence, weight loss, nutrition, and help with dressing. Four of these items (transferring, continence, feeding, and dressing) were derived from the Katz Activities of Daily Living scale, two items (weight loss and mobility) from the Mini Nutritional Assessment Short Form, and one item (energy) from the Quality of Life in Alzheimer’s Disease scale. The seven items were scored 0, 1, or 2, giving a total score ranging from 0 to 14. Elderly patients who scored ≥7 were considered frail, while those with a score <7 were considered non-frail, based on the FRAIL-NH scale. Fatigue was assessed using two self-reported questions from the Center for Epidemiologic Studies-Depression (CES-D) Scale: “In the last month, I felt that everything I did was an effort,” and “I was unable to start.” Weight loss was defined as an unintended loss of more than 5 kg during the previous three months, excluding changes due to activity or diet. Incontinence and the need for help with dressing were used as markers of functional decline in both inpatient and outpatient hospital settings.

**Table 1. A scale used to identify frailty in Public Hospital of Wolaita Zone; FRAIL NH scale, Southern Ethiopia, 2023(Adapted for hospital outpatient/inpatient sample).**

| **S.no** | **Frailty components** | **Score** | | |
| --- | --- | --- | --- | --- |
| **0** | **1** | **2** |
| **1** | Fatigue | None of the time | Some of the time | Most of the time |
| **2** | Resistance | Independent transfer | Some help from others | Completely dependent |
| **3** | Nutritional approach | Regular diet | Mechanical/altered diet | Tube feeding |
| **4** | Ambulation | Independent | Assistive device | Not able |
| **5** | Incontinence | None | Bladder | Bowel |
| **6** | Loss of weight | None | ≥5% in 3months | ≥10% in 6months |
| **7** | Help with dressing | Independent | Some help from others | Complete help from others |
| **8** | **Total score=14** | | | |
